# Supplementary material
Source: PubMed Central journal article supplement (PMC3105642)
Supplement: 2010.035600_2.pdf [file 2010.035600_2.pdf]

**Manuscript no. HAEMATOL/2010/035600 entitled “Relapse of aplastic anemia in children after immunosuppressive therapy: a report from the Japan Childhood Aplastic Anemia Study Group”**

**Authors: Takuya Kamio, Etsuro Ito, Akira Ohara, Yoshiyuki Kosaka, Masahiro Tsuchida, Hirosh Yagasaki, Hideo Mugishima, Hiromasa Yabe, Akira Morimoto, Shouichi Ohga, Hideki Muramatsu, Asahito Hama, Takashi Kaneko, Nagasawa Masayuki, Atsushi Kikuta, Yuko Osugi, Fumio Bessho, Tatsutoshi Nakahata, Ichiro Tsukimoto, and Seiji Kojima**

**Information about the contributions of each person named as having participated in the study**

**1) Guarantor(s)**, i.e., person(s) who is (are) responsible for the integrity of the work as a whole:

• Seiji Kojima, Department of Pediatrics, Nagoya University Graduate School of Medicine, E-mail: [kojima@med.nagoya-u.ac.jp](mailto:kojima@med.nagoya-u.ac.jp)

• Etsuro Ito, Department of Pediatrics, Hirosaki University Graduate School of Medicine, E-mail: [eturou@cc.hirosaki-u.ac.jp](mailto:eturou@cc.hirosaki-u.ac.jp)

According to the International Committee of Medical Journal Editors (ICMJE)

([http://www.icmje.org/ethical\\_1author.html](http://www.icmje.org/ethical_1author.html)): “*Authorship credit should be based on: 1) substantial contributions to conception and design, acquisition of data, or analysis and interpretation of data; 2) drafting the article or revising it critically for important intellectual content; and 3) final approval of the version to be published. Authors should meet conditions 1, 2, and 3 ..... Acquisition of funding, collection of data, or general supervision of the research group alone does not constitute authorship*”.

**The guarantors of this manuscript confirm that all persons designated as authors qualify for authorship, and that each author has participated sufficiently in the work to take public responsibility for appropriate portions of the content.**

**2) Authors who participated in the conception of the study:** Fumio Bessho, Tatsutoshi Nakahata, Ichiro Tsukimoto and Seiji Kojima.

**3) Design & Methods.** The following authors were responsible for specific investigations:

• Yoshiyuki Kosaka, Masahiro Tsuchida, Hiroshi Yagasaki, Hideo Mugishima, Hiromasa Yabe, Akira Morimoto, Shouichi Ohga, Hideki Muramatsu, Asahito Hama, Takashi Kaneko, Masayuki Nagasawa, Atsushi Kikuta and Yuko Osugi were responsible for enrolling patients and acquisition of data.

**4) Results.** The following authors were responsible for specific portions of the results, including figures and tables:

• Takuya Kamio and Etsuro Ito were responsible for Table 1, Table 2 and Figure 1.

**5) Writing the manuscript.** The following authors were responsible for writing the manuscript:

• Etsuro Ito, Takuya Kamio, Akira Ohara and Seiji Kojima were responsible for writing the manuscript.

**6) Contributors Listed in Acknowledgments:**

**List of hospitals and persons participating in the Japan Childhood Aplastic Anemia Study Group.**

Japanese Red Cross Nagoya First Hospital (K. Kato)

Kyoto Prefectural University of Medicine (S. Morimoto)

Kobe University School of Medicine (Y. Takeshima)

Hyogo College of Medicine (Y.Ohtsuka)  
Tokai University (H. Yabe)  
Shizuoka Children's Hospital (J. Mimaya)  
Fukushima Medical University (A. Kikuta)  
Kiyose Children's Hospital (T. Kaneko)  
Osaka City General Hospital (J. Hara)  
Nagoya University (S. Kojima)  
Jichi Medical School (T. Yamauchi)  
Kagoshima University (Y.Kawano)  
Okayama University (M. Oda)  
Hokkaido University (R. Kobayashi)  
Hiroshima University (S. Nishimura)  
Kanazawa University (S. Koizumi)  
Keio University (T. Mori)  
Hiroshima Red Cross Atomic Bomb Hospital (K. Hamamoto)  
Chiba University (T. Sato)  
Hirosaki University (E. Ito)  
Teikyo University School of Medicine (F. Ohta)  
Tottori University (T. Kawakami)  
Dokkyo University School of Medicine (K. Sugita)  
Kumamoto National Hospital (K. Takagi)  
Seirei Hamamatsu Hospital (T. Matsubayashi)  
Hyogo Children's Hospital (Y. Kosaka)  
Yokohama City University (K. Ikuta)  
Yamaguchi University (H. Ayukawa)  
Kanagawa Children's Medical Center (T. Kigasawa)  
Hirakata City Hospital (C. Kawakami)  
Nakadohri General Hospital (A. Watanabe)  
Gumma Children's Hospital (T. Shitara)  
National Defence Medical College (I. Sekine)  
Gifu University School of Medicine (K. Isogai)  
Kumamoto University School of Medicine (S. Morinaga)  
University of Ryukyu (N. Hyakuna)  
Narita Red Cross Hospital (K. Sunami)  
Asahikawa Medical College (M. Yoshida)  
Nagoya City University (Y. Ito)
